# Supplementary material for: Nutraceutical potential of Aerva lanata (L.) Juss. ex Schult ameliorates secondary complications in streptozotocin-induced diabetic rats
Source: Royal Society of Chemistry journal article supplement (doi:10.1039/c4fo00013g), 2014-06-09
Supplement: c4fo00013g1.pdf [file c4fo00013g1.pdf]

Supplementary Figure 1

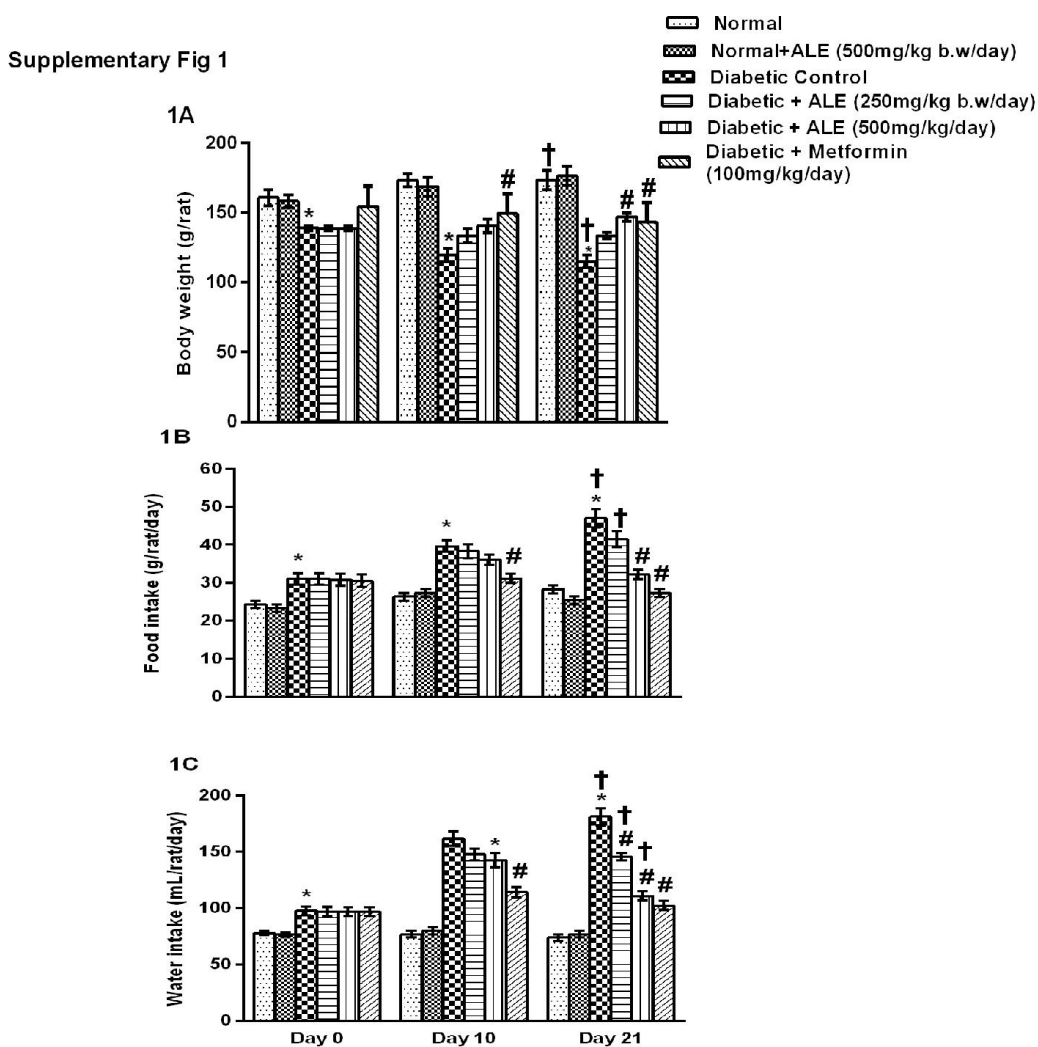

Supplementary Figure 1: Effect of ALE on body weight, food and water intake in normal and STZ induced diabetic rats: (A) change in body weight of the diabetic control rats were compared against normal rats and treated groups (B) food intake of diabetic rats fed chow diet was compared against normal and treated groups and (C) water intake of diabetic rats was compared against normal and treated groups. Data were collected at 3 different time points, i.e. 0, 10th and 21st day after the start of the experiment. Results are expressed as mean  $\pm$  SEM (n=6). \*indicates significant difference from normal control, # indicates significant difference from diabetic control and † indicates significant difference between Day 0 and Day 21  $p < 0.05$ .
